# Supplementary material
Source: publisher figshare collection journal article supplement (https://gsapubs.figshare.com/ndownloader/files/23314346)
Supplement: Supplementary file 1 [file 23314346]

## Sheet: all
Depth (m)	Time (Ma)*	MS (m3/kg)	*calibrated to the age of basal Gzhelian stage of 303.4 Ma at 220.33 m
0	332.468	-4.2e-10
0.05	332.458	-2.61e-09
0.1	332.449	-1.95e-09
0.15	332.439	2.8e-09
0.2	332.429	-2.72e-09
0.25	332.42	-2.3e-09
0.3	332.41	7.87e-10
0.35	332.401	-2.72e-10
0.4	332.391	-1.76e-09
0.45	332.381	-1.89e-09
0.5	332.372	-1.54e-09
0.55	332.362	4.05e-10
0.6	332.352	-1.9e-09
0.65	332.343	-1.22e-09
0.7	332.333	4.16e-10
0.75	332.323	1.36e-09
0.8	332.314	-1.22e-10
0.85	332.304	1.26e-09
0.9	332.294	2.52e-09
0.95	332.285	1.66e-09
1	332.275	3.8e-09
1.05	332.266	4.54e-09
1.1	332.259	2.42e-09
1.15	332.253	2.35e-09
1.2	332.247	1.93e-09
1.25	332.241	3.15e-10
1.3	332.235	-2.31e-10
1.35	332.229	-1.75e-09
1.4	332.223	-3.65e-09
1.45	332.216	3.97e-10
1.5	332.21	-8.18e-10
1.55	332.204	-1.79e-09
1.6	332.198	-2.93e-10
1.65	332.192	-1.27e-09
1.7	332.186	-3.24e-09
1.75	332.18	-3.22e-09
1.8	332.173	-3.34e-09
1.85	332.167	-2.7e-09
1.9	332.161	-1.88e-10
1.95	332.155	-1.32e-09
2	332.149	1.14e-09
2.05	332.143	-2.12e-09
2.1	332.137	-3.04e-09
2.15	332.131	-9.36e-10
2.2	332.124	4.8e-10
2.25	332.118	-7.94e-10
2.3	332.112	-3.58e-09
2.35	332.106	-4.66e-09
2.4	332.1	-2.39e-09
2.45	332.094	-2.95e-09
2.5	332.088	-3.51e-09
2.55	332.081	-3.58e-09
2.6	332.075	-3.59e-09
2.65	332.069	-1.16e-09
2.7	332.063	-3.82e-09
2.75	332.057	-4.45e-09
2.8	332.051	-4.44e-09
2.85	332.046	-4.05e-09
2.9	332.04	-2.36e-09
2.95	332.034	-3.29e-09
3	332.028	-3.38e-09
3.05	332.023	-2.46e-09
3.1	332.017	-1.95e-09
3.15	332.011	-5.28e-10
3.2	332.005	-2.2e-10
3.25	331.999	9.44e-10
3.3	331.994	-2.34e-09
3.35	331.988	-3.92e-09
3.4	331.982	-4.13e-09
3.45	331.976	-2.44e-09
3.5	331.97	3.34e-09
3.55	331.965	4.52e-09
3.6	331.959	-1.74e-09
3.65	331.953	-7.22e-10
3.7	331.947	1.91e-09
3.75	331.942	3.71e-09
3.8	331.936	3.24e-09
3.85	331.93	-1.13e-09
3.9	331.924	4.05e-10
3.95	331.918	2.21e-09
4	331.913	8.72e-11
4.05	331.907	1.5e-09
4.1	331.901	8.47e-10
4.15	331.895	5.35e-09
4.2	331.889	7.25e-09
4.25	331.884	3.87e-09
4.3	331.878	5.59e-09
4.35	331.872	8.03e-09
4.4	331.866	9e-09
4.45	331.861	9.1e-09
4.5	331.855	6.3e-09
4.55	331.849	5.62e-09
4.6	331.843	2.45e-09
4.65	331.837	1.53e-09
4.7	331.831	6.11e-09
4.75	331.825	3.11e-09
4.8	331.819	-6.69e-10
4.85	331.813	1.34e-10
4.9	331.807	1.02e-09
4.95	331.801	2.68e-09
5	331.795	-8.64e-10
5.05	331.789	-1.27e-10
5.1	331.783	2.47e-09
5.15	331.777	5.14e-09
5.2	331.771	3.08e-09
5.25	331.765	3.23e-09
5.3	331.759	6.15e-09
5.35	331.753	5.01e-09
5.4	331.747	-2.26e-10
5.45	331.741	4.56e-09
5.5	331.735	3.77e-09
5.55	331.729	-2.21e-09
5.6	331.724	-3.21e-09
5.65	331.718	-1.31e-09
5.7	331.712	-3.54e-09
5.75	331.706	5.36e-10
5.8	331.7	2e-09
5.85	331.694	1.58e-09
5.9	331.688	-1.28e-09
5.95	331.682	-7.95e-10
6	331.676	-2.43e-09
6.05	331.67	-8.88e-10
6.1	331.664	-2.4e-09
6.15	331.658	-1.52e-09
6.2	331.654	-3.18e-09
6.25	331.65	-2.22e-09
6.3	331.646	-1.48e-09
6.35	331.642	-7.8e-10
6.4	331.639	-1.15e-09
6.45	331.635	-7.58e-10
6.5	331.631	-8.37e-10
6.55	331.627	-1.49e-09
6.6	331.623	-1.58e-10
6.65	331.619	-1.72e-09
6.7	331.615	-7.12e-10
6.75	331.611	-2.21e-09
6.8	331.607	-2.07e-09
6.85	331.603	-3.47e-10
6.9	331.6	5.04e-10
6.95	331.596	1.19e-10
7	331.592	-7.19e-10
7.05	331.588	-5.1e-10
7.1	331.584	1.71e-09
7.15	331.58	9.4e-10
7.2	331.576	1.01e-09
7.25	331.572	1.85e-09
7.3	331.568	3.89e-09
7.35	331.565	2.13e-09
7.4	331.561	-6.69e-10
7.45	331.557	2.3e-09
7.5	331.553	-6.46e-10
7.55	331.549	-3.48e-13
7.6	331.545	8.12e-10
7.65	331.541	1.47e-09
7.7	331.537	8.51e-10
7.75	331.533	1.12e-09
7.8	331.529	-2.31e-10
7.85	331.526	-1.07e-09
7.9	331.522	5.82e-10
7.95	331.518	-6.64e-10
8	331.514	3.11e-09
8.05	331.51	9.95e-10
8.1	331.506	1.24e-09
8.15	331.502	3.2e-10
8.2	331.498	1.35e-10
8.25	331.494	2.67e-09
8.3	331.491	3.94e-09
8.35	331.487	5.54e-09
8.4	331.483	4.46e-09
8.45	331.479	3.63e-09
8.5	331.475	3.59e-09
8.55	331.471	1.42e-09
8.6	331.467	3.77e-09
8.65	331.463	4.06e-09
8.7	331.459	1.6e-09
8.75	331.456	6.46e-09
8.8	331.451	2.96e-09
8.85	331.447	3.83e-09
8.9	331.443	4.07e-09
8.95	331.439	1.47e-09
9	331.434	4.09e-09
9.05	331.43	4.86e-09
9.1	331.426	3.52e-09
9.15	331.422	5.2e-09
9.2	331.418	2.28e-09
9.25	331.413	2.68e-09
9.3	331.409	1.05e-09
9.35	331.405	3.16e-09
9.4	331.401	3.38e-09
9.45	331.396	3.6e-09
9.5	331.392	5.29e-09
9.55	331.388	1.41e-09
9.6	331.384	6.2e-10
9.65	331.38	1.5e-10
9.7	331.375	6.5e-11
9.75	331.371	2.29e-09
9.8	331.367	1.58e-09
9.85	331.363	2.43e-09
9.9	331.358	3.1e-09
9.95	331.354	1.67e-09
10	331.35	1.16e-09
10.05	331.346	4.8e-10
10.1	331.342	1.35e-09
10.15	331.337	9.7e-10
10.2	331.333	2.66e-09
10.25	331.329	5.89e-09
10.3	331.325	3.42e-09
10.35	331.321	3.52e-09
10.4	331.316	8.1e-10
10.45	331.312	4e-11
10.5	331.308	3.9e-10
10.55	331.304	1.4e-10
10.6	331.299	3.5e-10
10.65	331.295	2.17e-09
10.7	331.291	2.45e-09
10.75	331.287	1.66e-09
10.8	331.283	1.3e-09
10.85	331.278	1.96e-09
10.9	331.274	1.68e-09
10.95	331.27	5.3e-10
11	331.266	-8.8e-10
11.05	331.261	-1.82e-09
11.1	331.257	-2.02e-09
11.15	331.253	-1.81e-09
11.2	331.249	1.65e-09
11.25	331.245	1.89e-09
11.3	331.241	7e-10
11.35	331.237	6.7e-10
11.4	331.233	7.5e-10
11.45	331.229	1.41e-09
11.5	331.225	3.91e-09
11.55	331.221	3.23e-09
11.6	331.217	2.73e-09
11.65	331.213	3.51e-09
11.7	331.208	3.07e-09
11.75	331.204	1.95e-09
11.8	331.2	1.61e-09
11.85	331.196	1.05e-09
11.9	331.192	1.48e-09
11.95	331.188	1.34e-09
12	331.184	-2.6e-10
12.05	331.18	-6.2e-10
12.1	331.176	-4e-10
12.15	331.172	4.4e-10
12.2	331.168	1.08e-09
12.25	331.164	1.36e-09
12.3	331.16	-2.6e-10
12.35	331.156	-2.18e-09
12.4	331.152	-1.36e-09
12.45	331.148	1.9e-10
12.5	331.144	9.9e-10
12.55	331.14	3.7e-10
12.6	331.136	-8e-11
12.65	331.132	2.2e-10
12.7	331.127	-5e-11
12.75	331.123	1.82e-10
12.8	331.119	3.6e-09
12.85	331.115	4.4e-09
12.9	331.111	4.2e-09
12.95	331.107	1.18e-09
13	331.103	7.98e-10
13.05	331.099	2.02e-09
13.1	331.095	4.1e-09
13.15	331.091	4.44e-09
13.2	331.087	1.88e-09
13.25	331.083	5.6e-11
13.3	331.079	-3.2e-10
13.35	331.075	-4.3e-10
13.4	331.071	1.74e-09
13.45	331.067	1.79e-09
13.5	331.063	1.88e-09
13.55	331.059	2e-09
13.6	331.055	1.98e-09
13.65	331.051	1.91e-09
13.7	331.045	1.8e-09
13.75	331.04	1.97e-09
13.8	331.035	2.05e-09
13.85	331.029	1.88e-09
13.9	331.024	1.65e-09
13.95	331.019	8.6e-10
14	331.013	1.7e-09
14.05	331.008	1.84e-09
14.1	331.003	6.9e-10
14.15	330.997	6.5e-10
14.2	330.992	1.5e-09
14.25	330.987	9.4e-10
14.3	330.981	-3.5e-10
14.35	330.976	-1.9e-10
14.4	330.971	8.1e-10
14.45	330.965	3.2e-10
14.5	330.96	-6.8e-10
14.55	330.955	-8.8e-10
14.6	330.949	-1.84e-09
14.65	330.944	-1.11e-09
14.7	330.939	-4.71e-10
14.75	330.933	-1.04e-10
14.8	330.928	7.94e-10
14.85	330.923	-7.51e-10
14.9	330.917	-1.52e-09
14.95	330.912	-2.17e-09
15	330.907	-2.4e-09
15.05	330.901	-7.63e-10
15.1	330.896	-6.53e-10
15.15	330.891	-6.15e-10
15.2	330.885	-1.37e-09
15.25	330.88	-2.32e-09
15.3	330.875	-2.12e-09
15.35	330.869	6.48e-10
15.4	330.864	-3.82e-09
15.45	330.859	-1.17e-09
15.5	330.853	-3.68e-09
15.55	330.848	-3.6e-09
15.6	330.841	-3.96e-09
15.65	330.834	-2.67e-09
15.7	330.827	-1.5e-09
15.75	330.82	-1.17e-09
15.8	330.813	5.31e-11
15.85	330.806	-1.21e-09
15.9	330.799	-2.71e-09
15.95	330.792	-1.35e-09
16	330.785	-2.05e-09
16.05	330.778	-2.42e-09
16.1	330.771	-1.88e-09
16.15	330.764	-3.41e-09
16.2	330.757	-2.71e-09
16.25	330.75	-1.79e-09
16.3	330.743	2.27e-10
16.35	330.736	6.28e-10
16.4	330.729	3.29e-10
16.45	330.722	-1.12e-09
16.5	330.715	-1.47e-09
16.55	330.708	9.57e-10
16.6	330.701	1.65e-09
16.65	330.694	5.28e-10
16.7	330.687	2.17e-10
16.75	330.68	2.36e-10
16.8	330.673	-1.95e-10
16.85	330.666	-4.18e-10
16.9	330.659	2.79e-10
16.95	330.652	7.85e-10
17	330.646	1.35e-09
17.05	330.635	1.37e-09
17.1	330.625	2.91e-10
17.15	330.615	7.09e-10
17.2	330.605	8.23e-10
17.25	330.595	3.79e-10
17.3	330.585	1.09e-10
17.35	330.575	1.25e-09
17.4	330.565	1.19e-09
17.45	330.554	9.66e-10
17.5	330.544	-3.83e-10
17.55	330.534	-1.18e-09
17.6	330.524	-1.05e-09
17.65	330.514	2.37e-10
17.7	330.504	-2.12e-09
17.75	330.494	-4.09e-10
17.8	330.484	3.4e-10
17.85	330.473	9.63e-10
17.9	330.463	-6.56e-10
17.95	330.453	-3.5e-09
18	330.443	-1.93e-09
18.05	330.436	-3.4e-09
18.1	330.43	-4.15e-09
18.15	330.423	-1.29e-10
18.2	330.416	-1.29e-10
18.25	330.409	9.71e-10
18.3	330.403	-5.6e-10
18.35	330.396	-1.51e-09
18.4	330.389	-1.19e-09
18.45	330.382	-5.68e-10
18.5	330.376	9.66e-11
18.55	330.369	1.68e-09
18.6	330.362	-1.41e-09
18.65	330.355	-7.25e-10
18.7	330.349	-1.85e-09
18.75	330.342	2.31e-10
18.8	330.335	-2.31e-09
18.85	330.328	-3.39e-09
18.9	330.322	9.96e-10
18.95	330.315	1.15e-09
19	330.308	5.18e-10
19.05	330.301	-2.01e-09
19.1	330.295	3.89e-09
19.15	330.288	5.11e-09
19.2	330.281	2.93e-09
19.25	330.274	-8.2e-10
19.3	330.268	7.47e-10
19.35	330.261	4.41e-09
19.4	330.254	6.24e-09
19.45	330.247	2.5e-09
19.5	330.241	-7.11e-10
19.55	330.229	6.82e-10
19.6	330.218	2.49e-09
19.65	330.207	-3.13e-10
19.7	330.196	4.43e-09
19.75	330.184	2.81e-09
19.8	330.173	5.44e-10
19.85	330.162	4.58e-09
19.9	330.151	2.54e-09
19.95	330.139	-2.75e-10
20	330.128	6.94e-10
20.05	330.117	-3.07e-09
20.1	330.106	-2.4e-09
20.15	330.094	-1.72e-09
20.2	330.083	-1.62e-09
20.25	330.072	1.36e-09
20.3	330.061	-4.56e-10
20.35	330.049	-8.04e-10
20.4	330.038	-1.46e-09
20.45	330.034	9.56e-11
20.5	330.03	-1.89e-09
20.55	330.025	3.66e-11
20.6	330.021	-7.42e-10
20.65	330.017	4.96e-10
20.7	330.013	7.88e-10
20.75	330.008	2.24e-09
20.8	330.004	3.3e-09
20.85	330	1.5e-09
20.9	329.996	-3.52e-10
20.95	329.992	8.61e-11
21	329.987	4.99e-10
21.05	329.983	-2.98e-10
21.1	329.979	-1.12e-09
21.15	329.975	-1.51e-09
21.2	329.971	-1.85e-09
21.25	329.966	-2.19e-09
21.3	329.962	-2.6e-09
21.35	329.958	-3.16e-09
21.4	329.954	-2.8e-09
21.45	329.949	-4.09e-10
21.5	329.945	1.2e-09
21.55	329.941	9.07e-10
21.6	329.937	4.69e-10
21.65	329.933	3.95e-11
21.7	329.928	-3.03e-11
21.75	329.924	5.09e-10
21.8	329.92	1.69e-09
21.85	329.916	3.76e-09
21.9	329.911	3.52e-09
21.95	329.907	4.61e-11
22	329.903	-1.26e-09
22.05	329.899	3.42e-10
22.1	329.895	1.09e-09
22.15	329.89	7.47e-10
22.2	329.886	8.78e-10
22.25	329.882	1.54e-09
22.3	329.878	2.23e-09
22.35	329.873	2.89e-09
22.4	329.869	2.63e-09
22.45	329.865	1.57e-09
22.5	329.861	5.66e-10
22.55	329.857	3.45e-09
22.6	329.852	3.91e-09
22.65	329.848	4.81e-09
22.7	329.844	5.18e-09
22.75	329.84	5.58e-09
22.8	329.836	5.8e-09
22.85	329.831	5.22e-09
22.9	329.827	3.22e-09
22.95	329.822	2.36e-10
23	329.818	-5.44e-10
23.05	329.813	9.56e-10
23.1	329.809	4.8e-09
23.15	329.804	3.41e-09
23.2	329.8	1.33e-09
23.25	329.795	3.43e-09
23.3	329.791	4.9e-09
23.35	329.786	5.41e-09
23.4	329.782	4.76e-09
23.45	329.777	4.02e-09
23.5	329.773	3.25e-09
23.55	329.768	1.4e-09
23.6	329.764	-8.4e-11
23.65	329.759	-2.94e-10
23.7	329.755	-3.48e-09
23.75	329.75	-1.85e-09
23.8	329.746	-1.73e-09
23.85	329.741	-1.46e-09
23.9	329.737	-1.14e-09
23.95	329.732	-1.29e-09
24	329.728	-1.22e-09
24.05	329.723	-6.9e-10
24.1	329.719	6.12e-10
24.15	329.714	7.02e-10
24.2	329.71	-2.32e-09
24.25	329.705	-3.08e-09
24.3	329.701	-1.64e-09
24.35	329.696	1.3e-09
24.4	329.692	-6.22e-10
24.45	329.687	-7.78e-10
24.5	329.683	1.68e-09
24.55	329.678	1.86e-10
24.6	329.674	-1.74e-09
24.65	329.669	-3.14e-09
24.7	329.665	-4.09e-09
24.75	329.66	-2.87e-09
24.8	329.656	-1.49e-10
24.85	329.651	6.18e-10
24.9	329.647	2.14e-10
24.95	329.642	-1.67e-09
25	329.638	-2.21e-09
25.05	329.633	6.93e-10
25.1	329.626	-8.83e-10
25.15	329.618	-1.24e-09
25.2	329.611	3.68e-11
25.25	329.603	-3.23e-10
25.3	329.596	5.23e-10
25.35	329.588	-2.03e-09
25.4	329.581	-3.79e-09
25.45	329.573	-2.42e-09
25.5	329.566	-3.53e-10
25.55	329.558	6.77e-10
25.6	329.551	-1.45e-09
25.65	329.543	-3.53e-10
25.7	329.536	4.57e-10
25.75	329.528	-2.73e-10
25.8	329.521	-2.29e-09
25.85	329.513	4.39e-10
25.9	329.506	-1.51e-09
25.95	329.498	-3.37e-09
26	329.491	-4.26e-09
26.05	329.483	-4.5e-09
26.1	329.476	-3.25e-09
26.15	329.468	4.71e-10
26.2	329.461	3.38e-09
26.25	329.453	3.87e-09
26.3	329.446	1.81e-09
26.35	329.438	3.67e-09
26.4	329.431	1.5e-09
26.45	329.425	2.29e-09
26.5	329.42	4.44e-09
26.55	329.414	4.61e-09
26.6	329.409	3.26e-09
26.65	329.403	2.14e-09
26.7	329.398	1.63e-09
26.75	329.392	2.2e-09
26.8	329.387	1.53e-09
26.85	329.381	6.75e-11
26.9	329.376	-1.02e-09
26.95	329.37	-1.96e-09
27	329.365	-2.83e-10
27.05	329.359	7.84e-10
27.1	329.354	2.7e-09
27.15	329.348	3.31e-10
27.2	329.343	6.01e-10
27.25	329.337	1.52e-09
27.3	329.332	8.16e-10
27.35	329.327	3.32e-09
27.4	329.321	2.08e-09
27.45	329.316	9.41e-10
27.5	329.31	-9.56e-11
27.55	329.305	-1.21e-09
27.6	329.299	1.17e-10
27.65	329.294	-6.27e-10
27.7	329.288	4.34e-10
27.75	329.283	7.14e-10
27.8	329.277	7.31e-10
27.85	329.272	2.57e-09
27.9	329.266	3.78e-09
27.95	329.261	4.44e-09
28	329.255	4.74e-10
28.05	329.25	2.12e-09
28.1	329.244	3e-09
28.15	329.239	2.17e-09
28.2	329.233	6.53e-10
28.25	329.228	-1.68e-09
28.3	329.221	-8.58e-10
28.35	329.214	-1.7e-09
28.4	329.207	-2.49e-10
28.45	329.2	-1.22e-10
28.5	329.193	-1.75e-09
28.55	329.186	7.92e-10
28.6	329.179	4.39e-09
28.65	329.172	3.44e-09
28.7	329.165	1.62e-09
28.75	329.158	-1.18e-09
28.8	329.151	-2e-09
28.85	329.144	-1.94e-09
28.9	329.137	-2e-09
28.95	329.13	-1.59e-09
29	329.123	7.19e-10
29.05	329.116	1.54e-09
29.1	329.109	-1.43e-10
29.15	329.102	-8.41e-10
29.2	329.095	-9.17e-10
29.25	329.088	2.02e-10
29.3	329.081	4e-09
29.35	329.074	3.81e-09
29.4	329.067	1.83e-09
29.45	329.06	4.41e-09
29.5	329.053	5.07e-09
29.55	329.046	6.3e-09
29.6	329.039	5.02e-09
29.65	329.032	2.88e-09
29.7	329.026	3.9e-09
29.75	329.022	5.46e-09
29.8	329.018	3.86e-09
29.85	329.014	2.72e-09
29.9	329.01	5.01e-09
29.95	329.006	1.38e-09
30	329.002	-6.13e-11
30.05	328.998	5.54e-10
30.1	328.994	3.22e-09
30.15	328.99	5.53e-09
30.2	328.987	2.29e-09
30.25	328.983	1.35e-09
30.3	328.979	3.21e-10
30.35	328.975	-7.81e-10
30.4	328.971	-2.2e-09
30.45	328.967	-1.23e-09
30.5	328.963	1.52e-09
30.55	328.959	1.73e-09
30.6	328.955	3.5e-09
30.65	328.952	2.79e-09
30.7	328.948	1.31e-09
30.75	328.944	-7.72e-10
30.8	328.94	-1.16e-10
30.85	328.936	-1.05e-09
30.9	328.932	-1.17e-09
30.95	328.928	3.87e-09
31	328.924	2.07e-09
31.05	328.92	7.04e-10
31.1	328.916	-6.86e-10
31.15	328.913	-1.61e-09
31.2	328.909	1.64e-09
31.25	328.905	-1.08e-09
31.3	328.901	1.71e-09
31.35	328.897	3.32e-09
31.4	328.893	-2.72e-09
31.45	328.889	-3.6e-10
31.5	328.885	1.42e-09
31.55	328.881	-3.48e-09
31.6	328.878	-4.82e-09
31.65	328.874	-4.37e-09
31.7	328.87	-3.84e-09
31.75	328.866	4e-10
31.8	328.862	-4.45e-09
31.85	328.858	-4.31e-09
31.9	328.854	-6.61e-10
31.95	328.85	-2.32e-09
32	328.846	3.64e-10
32.05	328.842	-4.45e-09
32.1	328.839	-2.02e-09
32.15	328.835	6.02e-10
32.2	328.831	-4.4e-09
32.25	328.827	-3.68e-09
32.3	328.823	-4.64e-09
32.35	328.818	-2.36e-09
32.4	328.813	-3.67e-09
32.45	328.809	-1.63e-09
32.5	328.804	-4.27e-09
32.55	328.799	-3.45e-09
32.6	328.794	-2.83e-09
32.65	328.789	-1.45e-09
32.7	328.784	-5.24e-10
32.75	328.78	-5.43e-10
32.8	328.775	3.97e-10
32.85	328.77	-1.25e-09
32.9	328.765	-2.71e-09
32.95	328.76	-3.33e-09
33	328.756	-3.5e-09
33.05	328.751	-3.88e-09
33.1	328.746	-2.57e-10
33.15	328.741	-3.37e-09
33.2	328.736	-3.67e-09
33.25	328.731	-1.39e-09
33.3	328.727	-2.22e-09
33.35	328.722	-4.5e-10
33.4	328.717	-1.58e-09
33.45	328.712	3.87e-11
33.5	328.707	-1.04e-09
33.55	328.702	1.21e-09
33.6	328.698	1.96e-10
33.65	328.693	1.18e-09
33.7	328.688	9.85e-10
33.75	328.683	1.26e-09
33.8	328.678	1.23e-09
33.85	328.674	9.66e-10
33.9	328.669	1.5e-09
33.95	328.664	1.39e-09
34	328.659	1.39e-09
34.05	328.654	-6.44e-10
34.1	328.649	1.54e-09
34.15	328.645	1.61e-09
34.2	328.64	2.16e-09
34.25	328.635	2.75e-09
34.3	328.63	2.88e-09
34.35	328.625	3.08e-09
34.4	328.621	3.11e-09
34.45	328.615	2.9e-09
34.5	328.609	2.46e-09
34.55	328.604	2.69e-09
34.6	328.598	2.9e-09
34.65	328.592	2.38e-09
34.7	328.587	1.75e-09
34.75	328.581	-2.09e-09
34.8	328.576	-1.32e-09
34.85	328.57	5.71e-10
34.9	328.564	-1.91e-10
34.95	328.559	-8.05e-10
35	328.553	1.67e-10
35.05	328.547	4.3e-10
35.1	328.542	-1.78e-09
35.15	328.536	-1.94e-09
35.2	328.531	7.28e-10
35.25	328.525	4.34e-11
35.3	328.519	-2.74e-09
35.35	328.514	-2.43e-09
35.4	328.508	2.98e-11
35.45	328.502	2.55e-09
35.5	328.497	1.9e-09
35.55	328.491	6.5e-10
35.6	328.486	-1.43e-09
35.65	328.48	-2.71e-09
35.7	328.474	-1.2e-09
35.75	328.469	1.89e-09
35.8	328.463	2.26e-09
35.85	328.457	-5.41e-10
35.9	328.452	9.33e-10
35.95	328.446	-4.84e-10
36	328.441	-1.33e-09
36.05	328.435	5.88e-10
36.1	328.429	1.31e-09
36.15	328.424	-3.72e-10
36.2	328.418	-1.75e-09
36.25	328.413	-2.57e-09
36.3	328.409	-2.75e-09
36.35	328.404	-2.81e-09
36.4	328.4	-1.09e-09
36.45	328.395	2.87e-10
36.5	328.39	-1.31e-09
36.55	328.386	-1.69e-09
36.6	328.381	-1.24e-09
36.65	328.377	-1.43e-09
36.7	328.372	-2.5e-09
36.75	328.367	-3.39e-09
36.8	328.363	-3.87e-09
36.85	328.358	-4.29e-09
36.9	328.354	-4.31e-09
36.95	328.349	-3.41e-09
37	328.344	-2.12e-09
37.05	328.34	-6.11e-10
37.1	328.335	3e-10
37.15	328.331	-6.77e-10
37.2	328.326	-1.68e-09
37.25	328.321	-1.79e-09
37.3	328.317	-1.83e-09
37.35	328.312	-1.18e-09
37.4	328.308	-1.56e-09
37.45	328.303	-3.12e-09
37.5	328.298	-1.95e-09
37.55	328.294	1.75e-10
37.6	328.289	6.26e-10
37.65	328.285	-5.96e-10
37.7	328.28	-1.87e-09
37.75	328.275	-3.23e-09
37.8	328.271	-3.89e-09
37.85	328.266	-3.67e-09
37.9	328.262	-2.8e-09
37.95	328.257	-6.93e-10
38	328.252	-1.93e-09
38.05	328.248	-3.12e-09
38.1	328.243	-2.54e-09
38.15	328.239	3.68e-10
38.2	328.234	4.48e-10
38.25	328.229	8.25e-10
38.3	328.225	6.38e-10
38.35	328.22	5.68e-10
38.4	328.216	1.41e-09
38.45	328.21	1.31e-09
38.5	328.204	1.43e-09
38.55	328.198	1.43e-09
38.6	328.192	9.4e-10
38.65	328.186	7.6e-10
38.7	328.18	-8.4e-10
38.75	328.174	-1.11e-09
38.8	328.168	-1.85e-09
38.85	328.162	-9.6e-10
38.9	328.156	3.2e-10
38.95	328.15	1.8e-10
39	328.144	-4.2e-10
39.05	328.138	-5.6e-10
39.1	328.132	-5.4e-10
39.15	328.126	-2.36e-10
39.2	328.12	-7.23e-10
39.25	328.114	-2.6e-09
39.3	328.108	-1.25e-09
39.35	328.102	-4.93e-10
39.4	328.096	-9.75e-10
39.45	328.09	-1.89e-09
39.5	328.084	-2.07e-09
39.55	328.079	-2.53e-09
39.6	328.073	-2.62e-09
39.65	328.067	-1.67e-09
39.7	328.061	-1.52e-09
39.75	328.055	-5.26e-10
39.8	328.049	-2.51e-09
39.85	328.043	-7.46e-10
39.9	328.037	2.56e-10
39.95	328.031	-2.96e-09
40	328.025	-3.17e-09
40.05	328.019	-3.88e-09
40.1	328.013	-4.39e-09
40.15	328.007	-3.92e-09
40.2	328.001	-3.09e-09
40.25	327.995	-3.16e-09
40.3	327.988	-3.05e-09
40.35	327.982	-1.81e-09
40.4	327.976	-7.08e-10
40.45	327.97	-1.73e-09
40.5	327.964	-2.09e-09
40.55	327.958	-1.66e-09
40.6	327.952	-8.91e-10
40.65	327.946	-2.28e-09
40.7	327.939	-3.16e-09
40.75	327.933	-2.17e-09
40.8	327.927	-6e-10
40.85	327.921	-1.9e-09
40.9	327.915	-1.26e-09
40.95	327.909	-2.42e-09
41	327.903	-2.95e-09
41.05	327.896	-3.93e-09
41.1	327.89	-2.99e-09
41.15	327.884	-2.14e-09
41.2	327.878	-1.58e-09
41.25	327.872	-5.11e-10
41.3	327.866	4.39e-09
41.35	327.86	4.11e-09
41.4	327.853	2.43e-09
41.45	327.847	2.89e-10
41.5	327.841	2.89e-09
41.55	327.835	1.79e-09
41.6	327.829	2.52e-09
41.65	327.823	3.72e-09
41.7	327.817	3.79e-09
41.75	327.811	4.69e-09
41.8	327.805	2.92e-09
41.85	327.799	2.12e-09
41.9	327.793	2.32e-09
41.95	327.787	3e-09
42	327.781	2.66e-09
42.05	327.775	4.47e-10
42.1	327.769	-1.71e-09
42.15	327.763	-2.24e-09
42.2	327.757	-1.7e-10
42.25	327.751	1.07e-09
42.3	327.745	1.74e-09
42.35	327.739	6.81e-10
42.4	327.733	-2.48e-09
42.45	327.727	-3.74e-09
42.5	327.721	-3.95e-09
42.55	327.715	-2.68e-09
42.6	327.709	3.36e-09
42.65	327.703	-1.75e-09
42.7	327.697	5.06e-09
42.75	327.691	3.48e-09
42.8	327.685	2.83e-09
42.85	327.679	4.25e-09
42.9	327.674	2.62e-09
42.95	327.668	4.89e-09
43	327.662	3.06e-09
43.05	327.656	1.23e-09
43.1	327.65	5.65e-10
43.15	327.644	1.16e-10
43.2	327.638	1.82e-09
43.25	327.632	-1.82e-09
43.3	327.626	-1.96e-09
43.35	327.62	-2.63e-09
43.4	327.614	-2.55e-09
43.45	327.608	-4.7e-10
43.5	327.601	-2.89e-09
43.55	327.595	-1.59e-09
43.6	327.588	-1.13e-09
43.65	327.582	-2.6e-09
43.7	327.575	2.53e-09
43.75	327.569	1.63e-09
43.8	327.562	-1e-09
43.85	327.556	1.96e-10
43.9	327.549	2.6e-10
43.95	327.543	1.73e-09
44	327.536	1.76e-09
44.05	327.53	5.93e-10
44.1	327.523	3.4e-11
44.15	327.517	3.95e-09
44.2	327.51	-7.84e-10
44.25	327.503	3.36e-10
44.3	327.497	4.13e-09
44.35	327.49	5.81e-09
44.4	327.484	5.79e-09
44.45	327.477	3.52e-09
44.5	327.471	6.02e-09
44.55	327.464	5.5e-09
44.6	327.458	4.87e-09
44.65	327.451	2.45e-09
44.7	327.445	2.19e-09
44.75	327.438	-1.81e-09
44.8	327.432	1.66e-09
44.85	327.425	4.91e-09
44.9	327.419	4.21e-09
44.95	327.412	-2.03e-10
45	327.406	3.14e-09
45.05	327.399	-1.7e-09
45.1	327.393	4.25e-09
45.15	327.387	8.49e-10
45.2	327.381	-1.91e-09
45.25	327.375	3.74e-09
45.3	327.369	2.98e-09
45.35	327.363	4.66e-09
45.4	327.356	1.11e-09
45.45	327.35	-3.56e-09
45.5	327.344	-3.11e-09
45.55	327.338	-1.88e-09
45.6	327.332	8.85e-10
45.65	327.326	-8.85e-10
45.7	327.32	1.04e-09
45.75	327.313	-5.49e-10
45.8	327.307	-1.79e-10
45.85	327.301	-2.58e-09
45.9	327.295	-1.58e-09
45.95	327.289	-8.17e-10
46	327.283	2.35e-10
46.05	327.277	5e-11
46.1	327.271	3.73e-10
46.15	327.264	-1.28e-09
46.2	327.258	-1.41e-09
46.25	327.252	-1.01e-09
46.3	327.246	-1.75e-09
46.35	327.24	-1.93e-09
46.4	327.234	-1.52e-09
46.45	327.228	-2.46e-09
46.5	327.221	-2.52e-09
46.55	327.215	-3.09e-09
46.6	327.209	-1.71e-09
46.65	327.203	-3.57e-09
46.7	327.198	-3.85e-09
46.75	327.192	-3.15e-09
46.8	327.187	-1.27e-09
46.85	327.181	4.07e-10
46.9	327.176	-2.19e-10
46.95	327.17	-3.07e-09
47	327.165	-2.97e-09
47.05	327.159	-2.76e-09
47.1	327.154	-2.36e-09
47.15	327.148	-1.31e-09
47.2	327.143	-3e-09
47.25	327.137	-2.91e-09
47.3	327.132	-3.57e-09
47.35	327.126	-3.33e-09
47.4	327.121	-1.76e-09
47.45	327.115	-2.48e-09
47.5	327.11	-2.15e-09
47.55	327.104	-3.01e-09
47.6	327.099	-2.95e-09
47.65	327.094	2.27e-09
47.7	327.088	7.5e-10
47.75	327.083	7.3e-10
47.8	327.077	9.9e-10
47.85	327.072	-2.76e-09
47.9	327.066	-2.23e-09
47.95	327.061	-1.37e-09
48	327.055	-1.84e-10
48.05	327.05	-9.41e-10
48.1	327.044	-2.35e-09
48.15	327.039	-2.2e-09
48.2	327.033	-5.81e-10
48.25	327.028	-1.06e-09
48.3	327.022	-1.48e-10
48.35	327.017	-1.8e-11
48.4	327.011	7.33e-10
48.45	327.006	1.44e-09
48.5	327.001	2.15e-09
48.55	326.994	1.82e-09
48.6	326.988	1.61e-09
48.65	326.982	1.48e-09
48.7	326.976	1.92e-09
48.75	326.97	7.91e-10
48.8	326.964	5.56e-10
48.85	326.958	4.61e-10
48.9	326.951	1.86e-10
48.95	326.945	-4.58e-10
49	326.939	-5.18e-10
49.05	326.933	-2.03e-09
49.1	326.927	-8.02e-10
49.15	326.921	-2.8e-10
49.2	326.915	-1.41e-09
49.25	326.908	-2.44e-09
49.3	326.902	4.07e-10
49.35	326.896	4.7e-10
49.4	326.89	5e-10
49.45	326.884	-2.9e-09
49.5	326.878	-2.16e-09
49.55	326.872	-2.04e-09
49.6	326.866	-2.86e-09
49.65	326.859	-1.86e-09
49.7	326.853	-2.87e-09
49.75	326.847	-3.19e-09
49.8	326.841	-2.87e-09
49.85	326.835	-2.37e-09
49.9	326.829	-2.05e-09
49.95	326.823	-2.24e-09
50	326.816	-2.52e-09
50.05	326.81	-2.3e-09
50.1	326.804	-1.22e-09
50.15	326.798	-1.69e-09
50.2	326.793	-1.51e-09
50.25	326.789	-1.1e-09
50.3	326.784	-6.6e-10
50.35	326.779	-5.7e-10
50.4	326.774	-4.73e-10
50.45	326.77	-7.06e-10
50.5	326.765	-2.18e-09
50.55	326.76	-9.99e-10
50.6	326.756	-1.09e-09
50.65	326.751	-2.33e-09
50.7	326.746	-2.49e-09
50.75	326.741	-2.74e-09
50.8	326.737	-1.9e-09
50.85	326.732	-1.76e-09
50.9	326.727	-2.98e-09
50.95	326.723	-3.32e-09
51	326.718	-3.35e-09
51.05	326.713	-3.78e-09
51.1	326.709	-4.16e-09
51.15	326.704	-3.22e-09
51.2	326.699	-2.38e-09
51.25	326.694	-2.33e-09
51.3	326.69	-4.14e-09
51.35	326.685	-3.25e-09
51.4	326.68	-2.68e-09
51.45	326.676	-2.21e-09
51.5	326.671	-1.11e-09
51.55	326.666	3.86e-10
51.6	326.661	8.03e-10
51.65	326.657	-1.64e-09
51.7	326.652	-3.99e-09
51.75	326.647	-4.39e-09
51.8	326.643	-3.81e-09
51.85	326.638	-2.46e-09
51.9	326.633	-2.18e-09
51.95	326.628	-3.56e-09
52	326.624	-1.05e-09
52.05	326.619	-6.2e-10
52.1	326.614	2.1e-10
52.15	326.61	7.2e-10
52.2	326.605	8.7e-10
52.25	326.6	3.44e-09
52.3	326.596	4.79e-09
52.35	326.587	3.68e-09
52.4	326.579	1.85e-09
52.45	326.571	2.58e-09
52.5	326.563	3.26e-09
52.55	326.555	1.78e-09
52.6	326.547	7.6e-10
52.65	326.539	3.1e-10
52.7	326.531	4.3e-10
52.75	326.523	1.83e-09
52.8	326.515	6.43e-10
52.85	326.506	7.94e-10
52.9	326.498	-1.47e-10
52.95	326.49	-1.2e-09
53	326.482	-1.45e-09
53.05	326.474	-9.88e-10
53.1	326.466	-1.71e-09
53.15	326.458	-2.59e-09
53.2	326.45	-2.34e-09
53.25	326.442	-2.31e-09
53.3	326.434	-3.58e-09
53.35	326.425	-2.9e-09
53.4	326.417	-1.71e-09
53.45	326.409	-2.49e-09
53.5	326.401	-2.49e-09
53.55	326.393	-3.15e-09
53.6	326.387	-3.17e-09
53.65	326.381	-2.31e-09
53.7	326.375	-3.07e-09
53.75	326.368	-3.47e-09
53.8	326.362	-2.21e-09
53.85	326.356	-2e-09
53.9	326.35	-2.17e-09
53.95	326.344	-2.82e-09
54	326.338	-3.64e-09
54.05	326.332	-1.7e-09
54.1	326.326	-6.18e-10
54.15	326.319	-8.12e-11
54.2	326.313	9.24e-10
54.25	326.307	-7.12e-10
54.3	326.301	-2.43e-09
54.35	326.295	-3.19e-09
54.4	326.289	-3.11e-09
54.45	326.283	-3.06e-09
54.5	326.276	-3.78e-09
54.55	326.27	-3.66e-09
54.6	326.264	-3.02e-09
54.65	326.258	-1.54e-09
54.7	326.252	-2.9e-09
54.75	326.246	-3.4e-09
54.8	326.24	-3.34e-09
54.85	326.233	4.22e-09
54.9	326.227	9.6e-10
54.95	326.221	2.16e-09
55	326.215	3.1e-10
55.05	326.209	-7.2e-10
55.1	326.203	3.23e-09
55.15	326.197	1.68e-09
55.2	326.191	1.81e-09
55.25	326.186	-5e-11
55.3	326.181	-1.29e-09
55.35	326.176	3.6e-10
55.4	326.171	3.35e-09
55.45	326.166	-1.1e-09
55.5	326.162	-3.39e-09
55.55	326.157	-3.8e-09
55.6	326.152	-4.56e-09
55.65	326.147	-4.42e-09
55.7	326.142	-3.58e-09
55.75	326.137	-3.3e-09
55.8	326.133	-3.28e-09
55.85	326.128	-3.45e-09
55.9	326.123	-3.71e-09
55.95	326.118	-3.63e-09
56	326.113	-3.29e-09
56.05	326.109	-2.52e-09
56.1	326.104	-1.98e-09
56.15	326.099	-2.48e-09
56.2	326.094	-3.02e-09
56.25	326.089	-3.18e-09
56.3	326.084	-3.36e-09
56.35	326.08	-3.07e-09
56.4	326.075	-2.35e-09
56.45	326.07	-4.02e-09
56.5	326.065	-4.62e-09
56.55	326.06	-4.15e-09
56.6	326.056	-4.57e-09
56.65	326.051	-3.2e-09
56.7	326.046	-7.42e-10
56.75	326.041	-3.06e-09
56.8	326.036	-3.45e-09
56.85	326.031	-4.17e-09
56.9	326.027	-4.61e-09
56.95	326.022	-4.31e-09
57	326.017	-4.16e-09
57.05	326.012	-1.86e-09
57.1	326.007	-4.24e-09
57.15	326.002	-4.11e-09
57.2	325.998	-4.25e-09
57.25	325.993	-4.28e-09
57.3	325.988	-3.36e-09
57.35	325.982	-3.82e-09
57.4	325.977	-4.02e-09
57.45	325.971	-4.21e-09
57.5	325.966	-4.12e-09
57.55	325.96	-7.46e-10
57.6	325.954	-4.25e-09
57.65	325.949	-4.2e-09
57.7	325.943	-4.16e-09
57.75	325.937	-3.31e-09
57.8	325.932	-3.57e-09
57.85	325.926	-1.82e-09
57.9	325.921	-4.43e-09
57.95	325.915	-3.28e-09
58	325.909	-2.71e-09
58.05	325.904	-1.98e-09
58.1	325.898	-6.08e-10
58.15	325.892	-1.96e-09
58.2	325.887	-3.21e-09
58.25	325.881	-3.77e-09
58.3	325.876	-2.99e-09
58.35	325.87	-1.44e-09
58.4	325.864	-3.54e-09
58.45	325.859	-2.66e-09
58.5	325.853	-3.08e-10
58.55	325.847	-5.31e-10
58.6	325.842	-1.92e-09
58.65	325.836	-1.76e-09
58.7	325.831	-4.78e-10
58.75	325.825	-2.1e-09
58.8	325.819	-2.64e-09
58.85	325.814	-2.08e-09
58.9	325.808	-1.75e-09
58.95	325.802	4.12e-11
59	325.797	1.3e-09
59.05	325.791	1.76e-09
59.1	325.786	1.89e-09
59.15	325.78	1.77e-09
59.2	325.775	6.85e-10
59.25	325.77	-7.31e-10
59.3	325.764	-1.1e-09
59.35	325.759	-7.03e-10
59.4	325.754	-4.65e-10
59.45	325.748	-1.5e-09
59.5	325.743	-1.39e-09
59.55	325.738	-7.42e-10
59.6	325.732	-4.53e-10
59.65	325.727	-3.82e-10
59.7	325.722	-1.57e-09
59.75	325.716	-1.25e-09
59.8	325.711	-4.89e-10
59.85	325.706	-5.73e-10
59.9	325.7	-1.22e-10
59.95	325.695	-2.97e-10
60	325.69	-1.06e-09
60.05	325.684	-2.64e-09
60.1	325.679	-2.89e-09
60.15	325.674	-2.47e-09
60.2	325.668	-1.61e-09
60.25	325.663	-1.56e-09
60.3	325.658	-1.15e-09
60.35	325.652	-8.11e-10
60.4	325.647	-7.99e-10
60.45	325.642	-4.28e-10
60.5	325.636	-1.08e-09
60.55	325.631	-2.57e-09
60.6	325.626	-2.48e-09
60.65	325.62	-1.33e-09
60.7	325.615	-1.08e-09
60.75	325.61	-1.86e-09
60.8	325.604	-1.75e-09
60.85	325.599	-2.2e-11
60.9	325.594	3.76e-10
60.95	325.588	-1.9e-09
61	325.583	-2.98e-09
61.05	325.577	-3.3e-09
61.1	325.57	-1.61e-09
61.15	325.564	-1.41e-09
61.2	325.558	-3.19e-09
61.25	325.551	-4.11e-09
61.3	325.545	-3.45e-09
61.35	325.539	-3.14e-09
61.4	325.532	-2.73e-09
61.45	325.526	-1.01e-09
61.5	325.52	-1.13e-09
61.55	325.513	-8.06e-10
61.6	325.507	-1.3e-09
61.65	325.501	-2.29e-09
61.7	325.494	-1.91e-09
61.75	325.488	-8.03e-10
61.8	325.482	-2.15e-09
61.85	325.475	-2.59e-09
61.9	325.469	-2.1e-09
61.95	325.463	-1.36e-09
62	325.456	-1.55e-09
62.05	325.45	-2.1e-09
62.1	325.444	-1.53e-09
62.15	325.437	-1.16e-10
62.2	325.431	-2.15e-09
62.25	325.425	-3.29e-09
62.3	325.418	-5.96e-10
62.35	325.412	-4.46e-10
62.4	325.406	1.33e-09
62.45	325.399	7.92e-10
62.5	325.393	-8e-12
62.55	325.387	3.02e-10
62.6	325.381	3.72e-10
62.65	325.376	3.82e-10
62.7	325.372	8.22e-10
62.75	325.368	1.57e-09
62.8	325.364	1.06e-09
62.85	325.36	5.57e-10
62.9	325.356	2.47e-10
62.95	325.352	1.07e-10
63	325.348	1.12e-10
63.05	325.344	-1.06e-10
63.1	325.34	-9.74e-10
63.15	325.336	-2.32e-09
63.2	325.332	-2.82e-09
63.25	325.328	-2.37e-09
63.3	325.324	-1.33e-09
63.35	325.32	-2.82e-09
63.4	325.316	-2.15e-09
63.45	325.312	-3.92e-09
63.5	325.308	-4.36e-09
63.55	325.304	-3.8e-09
63.6	325.3	-2.98e-09
63.65	325.295	-2.28e-09
63.7	325.291	-3.04e-09
63.75	325.287	-3.14e-09
63.8	325.283	-3.17e-09
63.85	325.279	-1.73e-09
63.9	325.275	-1.87e-09
63.95	325.271	-3.26e-09
64	325.267	-3.25e-09
64.05	325.263	-2.94e-09
64.1	325.259	-2.07e-09
64.15	325.255	-1e-09
64.2	325.251	-2.09e-09
64.25	325.247	-3.85e-09
64.3	325.243	-4.19e-09
64.35	325.239	-3.45e-09
64.4	325.235	-2.86e-09
64.45	325.231	-2.78e-09
64.5	325.227	-2.56e-09
64.55	325.223	-2.77e-09
64.6	325.219	-3.4e-09
64.65	325.214	-3.97e-09
64.7	325.21	-3.33e-09
64.75	325.206	-2.73e-09
64.8	325.202	-1.77e-09
64.85	325.198	-8.41e-10
64.9	325.194	-1.68e-09
64.95	325.19	-2.59e-09
65	325.186	-3.48e-09
65.05	325.182	-4.21e-09
65.1	325.178	-3.13e-09
65.15	325.174	-2.92e-09
65.2	325.17	-4.4e-09
65.25	325.166	-4.13e-09
65.3	325.162	-3.26e-09
65.35	325.159	-2.92e-09
65.4	325.155	-2.69e-09
65.45	325.151	-1.17e-09
65.5	325.147	-1.58e-09
65.55	325.143	-3.15e-09
65.6	325.139	-3.09e-09
65.65	325.135	-3.09e-09
65.7	325.131	-3.39e-09
65.75	325.127	-3.66e-09
65.8	325.123	-3.62e-09
65.85	325.12	-2.03e-09
65.9	325.116	-1.98e-09
65.95	325.112	-2.51e-09
66	325.108	-2.76e-09
66.05	325.104	-1.25e-09
66.1	325.1	-1.02e-09
66.15	325.096	-1.71e-09
66.2	325.092	-1.45e-09
66.25	325.088	-2.37e-09
66.3	325.085	-4.1e-09
66.35	325.081	-3.94e-09
66.4	325.077	-1.99e-09
66.45	325.073	-1.15e-09
66.5	325.069	-6.92e-10
66.55	325.065	7.43e-10
66.6	325.061	8.64e-10
66.65	325.057	6.82e-10
66.7	325.053	1.2e-09
66.75	325.049	9.73e-10
66.8	325.046	1.93e-10
66.85	325.042	8.02e-10
66.9	325.038	2.2e-10
66.95	325.034	-7.93e-10
67	325.03	-2.69e-09
67.05	325.026	-3.24e-09
67.1	325.022	-3.18e-09
67.15	325.018	-2.51e-09
67.2	325.014	-1.43e-09
67.25	325.011	-8.81e-10
67.3	325.007	-1.68e-09
67.35	325.003	2.6e-10
67.4	324.999	1.1e-09
67.45	324.995	3.58e-09
67.5	324.991	3.06e-09
67.55	324.987	2.97e-09
67.6	324.983	2.43e-09
67.65	324.979	1.61e-09
67.7	324.976	1.57e-09
67.75	324.971	2.53e-09
67.8	324.967	3.92e-09
67.85	324.962	2.95e-09
67.9	324.958	3.59e-09
67.95	324.953	3.76e-09
68	324.949	3.1e-09
68.05	324.945	2.17e-09
68.1	324.94	1.06e-09
68.15	324.936	-2.23e-09
68.2	324.931	-1.12e-09
68.25	324.927	-2.02e-10
68.3	324.923	-1.3e-11
68.35	324.918	-9.29e-10
68.4	324.914	-7.09e-10
68.45	324.909	6.28e-10
68.5	324.905	-4.4e-10
68.55	324.901	-5.8e-10
68.6	324.896	-7.8e-11
68.65	324.892	-1.6e-09
68.7	324.887	-2.24e-09
68.75	324.883	4.69e-11
68.8	324.879	6.85e-10
68.85	324.874	1.1e-11
68.9	324.87	-1e-11
68.95	324.865	6.96e-10
69	324.861	-8.1e-10
69.05	324.857	-1.27e-09
69.1	324.852	4.5e-10
69.15	324.848	6.62e-10
69.2	324.843	4.53e-10
69.25	324.839	-4.57e-10
69.3	324.835	-1.77e-09
69.35	324.83	-2.28e-09
69.4	324.826	-1.22e-10
69.45	324.821	-1.71e-09
69.5	324.817	-9.6e-11
69.55	324.813	-1.54e-09
69.6	324.808	-2.13e-09
69.65	324.804	-2.64e-10
69.7	324.799	-1.51e-09
69.75	324.795	-1.59e-09
69.8	324.791	-2.55e-09
69.85	324.786	-2.06e-09
69.9	324.782	-2.3e-09
69.95	324.777	2.32e-09
70	324.773	1.83e-09
70.05	324.769	2.38e-09
70.1	324.764	3.72e-09
70.15	324.76	2.78e-09
70.2	324.755	-8.77e-10
70.25	324.751	1.83e-10
70.3	324.747	5.06e-10
70.35	324.742	-4.51e-10
70.4	324.738	-2.89e-10
70.45	324.733	4.25e-10
70.5	324.729	1.32e-09
70.55	324.725	-1.63e-09
70.6	324.72	-3.03e-09
70.65	324.716	-2.49e-09
70.7	324.711	-1.8e-10
70.75	324.707	-2.43e-09
70.8	324.703	-1.73e-09
70.85	324.698	2.49e-09
70.9	324.694	2.18e-09
70.95	324.689	-5.11e-10
71	324.685	-3.76e-10
71.05	324.681	-8.43e-10
71.1	324.676	-2.24e-10
71.15	324.672	2.05e-09
71.2	324.667	2.52e-09
71.25	324.663	3.28e-09
71.3	324.659	2.44e-09
71.35	324.654	3.06e-09
71.4	324.65	-2.43e-09
71.45	324.645	-6.47e-10
71.5	324.641	2.38e-09
71.55	324.637	3.91e-11
71.6	324.632	3.52e-09
71.65	324.628	2.2e-09
71.7	324.623	9.92e-10
71.75	324.619	2.07e-09
71.8	324.615	4.1e-09
71.85	324.61	5.37e-09
71.9	324.606	6.2e-09
71.95	324.601	-6.93e-10
72	324.597	-1.9e-09
72.05	324.593	5.65e-10
72.1	324.588	-3.14e-09
72.15	324.584	-2.25e-09
72.2	324.579	3.06e-09
72.25	324.575	5.59e-09
72.3	324.571	5.03e-09
72.35	324.566	4.26e-09
72.4	324.562	3.58e-09
72.45	324.558	2.4e-09
72.5	324.553	4.29e-09
72.55	324.549	3.27e-09
72.6	324.545	3.47e-09
72.65	324.54	5.04e-09
72.7	324.536	3.48e-09
72.75	324.532	4.74e-09
72.8	324.527	-3.17e-09
72.85	324.523	-1.82e-09
72.9	324.519	1.86e-09
72.95	324.514	-2.21e-09
73	324.51	1.54e-10
73.05	324.506	-9.24e-10
73.1	324.502	-7.71e-10
73.15	324.497	1.22e-09
73.2	324.493	3.95e-09
73.25	324.489	2.4e-09
73.3	324.484	4.44e-09
73.35	324.48	3.82e-09
73.4	324.476	3e-09
73.45	324.471	1.71e-09
73.5	324.467	-3.56e-10
73.55	324.463	-1.42e-09
73.6	324.458	1.4e-09
73.65	324.454	6.33e-10
73.7	324.45	2.51e-09
73.75	324.446	1.34e-09
73.8	324.441	2.3e-09
73.85	324.437	2.14e-09
73.9	324.433	2.85e-09
73.95	324.428	3.49e-09
74	324.424	2.08e-09
74.05	324.42	-2.28e-10
74.1	324.415	2.95e-10
74.15	324.411	2.07e-09
74.2	324.407	3.26e-09
74.25	324.402	3.23e-09
74.3	324.398	3.65e-09
74.35	324.394	4e-09
74.4	324.39	2.6e-09
74.45	324.385	1.31e-09
74.5	324.381	1.39e-10
74.55	324.377	-1.22e-09
74.6	324.372	-2.51e-09
74.65	324.368	-2.97e-10
74.7	324.362	-2.78e-09
74.75	324.357	-2.74e-09
74.8	324.351	-2.38e-09
74.85	324.346	-1.88e-09
74.9	324.34	-2.91e-11
74.95	324.334	4.3e-10
75	324.329	-6.79e-10
75.05	324.323	-1.46e-09
75.1	324.317	-1.41e-09
75.15	324.312	-1.04e-09
75.2	324.306	-1.22e-09
75.25	324.301	3.45e-11
75.3	324.295	1.63e-09
75.35	324.289	-1.57e-09
75.4	324.284	-1.76e-09
75.45	324.278	1.2e-09
75.5	324.272	2.45e-09
75.55	324.267	-5.4e-11
75.6	324.261	-2.46e-09
75.65	324.256	-2.35e-09
75.7	324.25	-1.38e-09
75.75	324.244	-9.95e-10
75.8	324.239	-4.65e-10
75.85	324.233	2.7e-11
75.9	324.227	-3.52e-10
75.95	324.222	-1.02e-09
76	324.216	-2.21e-09
76.05	324.211	-3.93e-09
76.1	324.205	-3.97e-09
76.15	324.199	-2.09e-10
76.2	324.194	2.44e-09
76.25	324.188	4.26e-09
76.3	324.182	9.13e-10
76.35	324.177	-3.51e-11
76.4	324.171	3.76e-09
76.45	324.166	4.18e-09
76.5	324.158	2.19e-09
76.55	324.151	3.51e-09
76.6	324.143	3.77e-09
76.65	324.136	1.73e-09
76.7	324.128	2.54e-09
76.75	324.121	-8.49e-10
76.8	324.113	-2.4e-09
76.85	324.106	-3.39e-09
76.9	324.098	-3.86e-09
76.95	324.091	-3.5e-10
77	324.083	-1.08e-09
77.05	324.076	-8.5e-10
77.1	324.068	-3.22e-09
77.15	324.061	-3.31e-09
77.2	324.053	-2.88e-09
77.25	324.046	-2.38e-09
77.3	324.038	-1.78e-09
77.35	324.031	-2.13e-09
77.4	324.023	-8.05e-10
77.45	324.016	-5.87e-10
77.5	324.008	-1.6e-09
77.55	324.001	-2.39e-09
77.6	323.993	-3.41e-09
77.65	323.986	-4.02e-09
77.7	323.978	-2.88e-09
77.75	323.971	-2.85e-09
77.8	323.963	-4.07e-09
77.85	323.958	-4.23e-09
77.9	323.954	-4.05e-09
77.95	323.949	-3.08e-09
78	323.945	-3.52e-09
78.05	323.94	3.99e-10
78.1	323.935	-1.8e-09
78.15	323.931	-1.25e-09
78.2	323.926	5.26e-11
78.25	323.922	-1.93e-09
78.3	323.917	-2.89e-09
78.35	323.912	-2.9e-09
78.4	323.908	-1.56e-09
78.45	323.903	-1.06e-09
78.5	323.899	-3.57e-09
78.55	323.894	-4.05e-09
78.6	323.889	-3.89e-09
78.65	323.885	-3.21e-09
78.7	323.88	-3.34e-09
78.75	323.876	-2.99e-09
78.8	323.871	-2.16e-09
78.85	323.866	-1.9e-09
78.9	323.862	-2.3e-09
78.95	323.857	-2.52e-09
79	323.853	-2.72e-09
79.05	323.848	-2.52e-09
79.1	323.843	-2.12e-09
79.15	323.839	-2.1e-09
79.2	323.834	-2.26e-09
79.25	323.83	-2.87e-09
79.3	323.825	-3.38e-09
79.35	323.82	-3.05e-09
79.4	323.816	-2.27e-09
79.45	323.811	-1.55e-09
79.5	323.807	-2.25e-09
79.55	323.802	-9.46e-10
79.6	323.797	-2.42e-09
79.65	323.793	-2.77e-09
79.7	323.788	-3.05e-09
79.75	323.784	-1.24e-09
79.8	323.779	-1.92e-09
79.85	323.774	-2.61e-09
79.9	323.77	-9e-10
79.95	323.765	2.15e-09
80	323.761	1.43e-09
80.05	323.754	-3e-11
80.1	323.748	1.44e-09
80.15	323.742	1.78e-09
80.2	323.736	7.1e-10
80.25	323.73	4.6e-10
80.3	323.724	-1.47e-09
80.35	323.718	-2.31e-09
80.4	323.711	-2.34e-09
80.45	323.705	6.46e-11
80.5	323.699	8.49e-10
80.55	323.693	-1.37e-10
80.6	323.687	-1.09e-09
80.65	323.681	-2.19e-09
80.7	323.675	-2.65e-09
80.75	323.668	-2.5e-09
80.8	323.662	-2.14e-09
80.85	323.656	-2.41e-09
80.9	323.65	-1.41e-09
80.95	323.644	-8.54e-10
81	323.638	-1.62e-09
81.05	323.632	-8.12e-10
81.1	323.626	-9.04e-10
81.15	323.619	-1.58e-09
81.2	323.613	-2.16e-09
81.25	323.607	-2.19e-09
81.3	323.601	-2.63e-09
81.35	323.595	-2.61e-09
81.4	323.589	-2.06e-09
81.45	323.583	-1.81e-09
81.5	323.576	-1.94e-09
81.55	323.57	-2.42e-09
81.6	323.564	-3.14e-09
81.65	323.558	-3.9e-09
81.7	323.554	-4.08e-09
81.75	323.55	-4.18e-09
81.8	323.546	-4.04e-09
81.85	323.542	-3.63e-09
81.9	323.538	-2.84e-09
81.95	323.534	-2.42e-09
82	323.53	-2.52e-09
82.05	323.526	-2.38e-09
82.1	323.522	-2.07e-09
82.15	323.518	-1.5e-09
82.2	323.514	4.53e-10
82.25	323.51	-1.81e-09
82.3	323.506	-2.96e-09
82.35	323.502	-3.59e-09
82.4	323.498	-2.23e-09
82.45	323.494	1.97e-09
82.5	323.491	-1.31e-09
82.55	323.487	-1.37e-09
82.6	323.483	1.84e-09
82.65	323.479	-4.01e-10
82.7	323.475	7.72e-10
82.75	323.471	5.44e-09
82.8	323.467	5.06e-09
82.85	323.463	5e-09
82.9	323.459	5.19e-09
82.95	323.455	3.71e-09
83	323.451	2.04e-09
83.05	323.447	4.84e-09
83.1	323.443	3.42e-09
83.15	323.439	2.06e-09
83.2	323.435	3.72e-09
83.25	323.431	5.58e-09
83.3	323.427	3.16e-09
83.35	323.423	6.33e-09
83.4	323.419	5.39e-09
83.45	323.415	4.41e-09
83.5	323.411	2.83e-09
83.55	323.407	1.72e-09
83.6	323.403	2.61e-09
83.65	323.399	3.89e-09
83.7	323.395	2.72e-09
83.75	323.391	2.84e-09
83.8	323.387	2.73e-09
83.85	323.383	3.36e-09
83.9	323.379	4.07e-09
83.95	323.375	1.95e-09
84	323.371	3.05e-09
84.05	323.367	1.04e-09
84.1	323.363	9.3e-10
84.15	323.359	2.1e-10
84.2	323.356	1.4e-09
84.25	323.353	3.23e-09
84.3	323.35	4.57e-09
84.35	323.347	3.57e-09
84.4	323.344	5.76e-09
84.45	323.341	3.34e-09
84.5	323.339	4.42e-09
84.55	323.336	5.05e-09
84.6	323.333	5.31e-09
84.65	323.33	2.64e-09
84.7	323.327	4.56e-09
84.75	323.325	2.27e-09
84.8	323.322	4.28e-10
84.85	323.319	3.07e-09
84.9	323.316	3.26e-09
84.95	323.313	5.46e-09
85	323.311	6.91e-09
85.05	323.308	6.36e-09
85.1	323.305	4.92e-09
85.15	323.302	4.97e-09
85.2	323.299	2.27e-09
85.25	323.296	-2.53e-11
85.3	323.294	1.29e-09
85.35	323.291	3.13e-09
85.4	323.288	4.01e-09
85.45	323.285	6.97e-09
85.5	323.282	5.7e-09
85.55	323.28	3.31e-09
85.6	323.277	4.01e-09
85.65	323.274	1.52e-09
85.7	323.271	1.95e-09
85.75	323.268	8.91e-10
85.8	323.266	-3.9e-11
85.85	323.263	2.02e-09
85.9	323.26	3.06e-09
85.95	323.257	2.83e-09
86	323.254	2.92e-09
86.05	323.251	2.33e-09
86.1	323.249	1.75e-09
86.15	323.246	2.7e-10
86.2	323.243	-8.1e-10
86.25	323.24	-1.53e-09
86.3	323.237	2.69e-11
86.35	323.235	-9.82e-11
86.4	323.232	-6.37e-10
86.45	323.229	-1.62e-10
86.5	323.226	-8.77e-10
86.55	323.223	-1.14e-09
86.6	323.221	-2.02e-09
86.65	323.218	2.32e-10
86.7	323.215	-1.7e-11
86.75	323.212	1.57e-10
86.8	323.209	-1.61e-09
86.85	323.206	-1.25e-10
86.9	323.204	-2.23e-09
86.95	323.201	-9.15e-10
87	323.198	-1.32e-09
87.05	323.195	-1.66e-09
87.1	323.192	-2.25e-09
87.15	323.19	-1.67e-09
87.2	323.187	1.49e-10
87.25	323.184	-2.67e-09
87.3	323.181	-2.73e-09
87.35	323.178	-1.31e-10
87.4	323.176	-2.31e-09
87.45	323.173	-3.06e-09
87.5	323.17	-2.37e-09
87.55	323.167	-2.89e-09
87.6	323.164	-3.19e-09
87.65	323.161	-2.23e-09
87.7	323.159	-1.95e-09
87.75	323.156	-1.82e-09
87.8	323.153	-2.08e-10
87.85	323.149	-2.69e-09
87.9	323.146	-2.61e-09
87.95	323.142	-2.75e-09
88	323.139	-3.49e-09
88.05	323.135	-2.78e-09
88.1	323.131	-8.52e-10
88.15	323.128	-1.66e-09
88.2	323.124	-3.29e-09
88.25	323.12	-2.41e-10
88.3	323.117	-2.01e-09
88.35	323.113	-1.96e-09
88.4	323.11	-2.35e-09
88.45	323.106	-2.63e-09
88.5	323.102	-3.25e-09
88.55	323.099	-3.35e-09
88.6	323.095	-2.35e-09
88.65	323.092	-3.04e-09
88.7	323.088	-3.44e-10
88.75	323.084	-2.45e-09
88.8	323.081	-1.43e-09
88.85	323.077	-3.35e-09
88.9	323.073	-3.68e-09
88.95	323.07	-2.47e-09
89	323.066	-2.26e-09
89.05	323.063	-1.99e-09
89.1	323.059	-2.47e-09
89.15	323.055	-2.79e-10
89.2	323.052	-2.27e-09
89.25	323.048	-3.01e-09
89.3	323.045	-3.86e-09
89.35	323.041	-2.22e-09
89.4	323.037	1.09e-09
89.45	323.034	-3.99e-11
89.5	323.03	5.44e-10
89.55	323.026	2.07e-09
89.6	323.023	2.75e-09
89.65	323.019	3.45e-10
89.7	323.016	3.15e-09
89.75	323.012	9.54e-10
89.8	323.008	-6.77e-10
89.85	323.005	2.96e-10
89.9	323.001	5.75e-10
89.95	322.998	-9.73e-10
90	322.994	-1.18e-09
90.05	322.99	-8.53e-10
90.1	322.987	-1.26e-09
90.15	322.983	-1.14e-09
90.2	322.979	-2.06e-10
90.25	322.976	-5.02e-10
90.3	322.972	-2.01e-09
90.35	322.969	-1.63e-09
90.4	322.965	-9.47e-10
90.45	322.961	-1.21e-09
90.5	322.958	5.15e-10
90.55	322.954	1.49e-09
90.6	322.951	2.94e-09
90.65	322.945	2.65e-09
90.7	322.94	1.97e-09
90.75	322.935	2.34e-09
90.8	322.929	2.98e-09
90.85	322.924	3.46e-09
90.9	322.919	3.45e-09
90.95	322.913	2.43e-09
91	322.908	1.96e-09
91.05	322.903	1.66e-09
91.1	322.897	2.5e-11
91.15	322.892	-4.43e-10
91.2	322.887	-1.18e-10
91.25	322.881	1.25e-09
91.3	322.876	8.12e-10
91.35	322.871	-5.93e-10
91.4	322.865	-3.37e-10
91.45	322.86	-6.43e-10
91.5	322.855	8.9e-12
91.55	322.849	4.13e-10
91.6	322.844	-4.99e-10
91.65	322.839	-8.1e-10
91.7	322.833	-4.14e-10
91.75	322.828	-1.18e-09
91.8	322.823	-1.08e-09
91.85	322.817	-6.65e-10
91.9	322.812	-2e-09
91.95	322.807	-1.66e-09
92	322.801	-1.98e-09
92.05	322.796	-1.54e-09
92.1	322.791	-1.67e-09
92.15	322.785	-1.66e-09
92.2	322.78	-2.5e-09
92.25	322.775	-2.86e-09
92.3	322.769	-3.43e-09
92.35	322.764	-4.26e-09
92.4	322.759	-4.18e-09
92.45	322.753	-3.92e-09
92.5	322.748	-4.08e-09
92.55	322.745	-3.85e-09
92.6	322.742	-2.79e-09
92.65	322.739	-2.47e-09
92.7	322.735	-3.11e-09
92.75	322.732	-3.16e-09
92.8	322.729	-3.09e-09
92.85	322.726	-3.43e-09
92.9	322.723	-3.34e-09
92.95	322.72	-3.22e-09
93	322.716	-2.82e-09
93.05	322.713	-2.72e-09
93.1	322.71	-3.18e-09
93.15	322.707	-1.86e-09
93.2	322.704	-1.34e-09
93.25	322.701	-2.17e-09
93.3	322.697	-2.94e-09
93.35	322.694	-3.09e-09
93.4	322.691	-2.28e-09
93.45	322.688	-1.97e-09
93.5	322.685	-2.85e-09
93.55	322.682	-2.66e-09
93.6	322.678	-2.38e-09
93.65	322.675	-1.49e-09
93.7	322.672	-1.27e-09
93.75	322.669	-1.51e-09
93.8	322.666	-2.26e-09
93.85	322.663	-3.38e-09
93.9	322.659	-2.53e-09
93.95	322.656	-2.06e-09
94	322.653	-2.82e-09
94.05	322.65	-3.63e-09
94.1	322.647	-4.05e-09
94.15	322.644	-2.81e-09
94.2	322.64	-1.21e-09
94.25	322.637	-1.06e-09
94.3	322.634	-1.13e-09
94.35	322.631	-1.68e-09
94.4	322.628	-8.86e-10
94.45	322.625	-1.33e-09
94.5	322.621	-2.56e-09
94.55	322.618	-2.72e-09
94.6	322.615	-2.98e-09
94.65	322.612	-2.8e-09
94.7	322.609	-1.54e-09
94.75	322.606	-2.4e-09
94.8	322.602	-2.91e-09
94.85	322.599	-1.83e-09
94.9	322.596	-1.31e-09
94.95	322.593	-1.01e-09
95	322.59	-6.15e-10
95.05	322.587	-1.96e-09
95.1	322.583	-2.65e-09
95.15	322.58	-1.13e-09
95.2	322.577	-1.02e-09
95.25	322.574	-2.4e-09
95.3	322.571	-2.77e-09
95.35	322.568	-3.14e-09
95.4	322.564	-1e-11
95.45	322.561	1.04e-09
95.5	322.558	5.5e-10
95.55	322.555	1.6e-10
95.6	322.552	6.9e-10
95.65	322.549	1.79e-09
95.7	322.546	2.68e-09
95.75	322.539	3.15e-09
95.8	322.532	8.5e-10
95.85	322.525	-6.6e-10
95.9	322.519	-2.47e-09
95.95	322.512	-2.36e-09
96	322.505	-1.17e-09
96.05	322.498	-1.13e-09
96.1	322.492	-8.18e-10
96.15	322.485	7.22e-11
96.2	322.478	-3.32e-10
96.25	322.471	-5.06e-10
96.3	322.465	-1.42e-09
96.35	322.458	-2.94e-09
96.4	322.451	-2.83e-09
96.45	322.444	-1.84e-09
96.5	322.438	-5.1e-10
96.55	322.431	-5.02e-10
96.6	322.424	-2.57e-09
96.65	322.417	-2.83e-09
96.7	322.411	-1.72e-09
96.75	322.404	-2.13e-09
96.8	322.397	-1.85e-09
96.85	322.39	-1.05e-09
96.9	322.384	6.18e-10
96.95	322.377	1.05e-09
97	322.37	2.05e-09
97.05	322.363	1.26e-09
97.1	322.357	-9.11e-10
97.15	322.35	6.38e-10
97.2	322.343	-1.51e-09
97.25	322.334	-2.58e-09
97.3	322.325	-2.6e-09
97.35	322.315	-2.37e-09
97.4	322.306	-2.53e-09
97.45	322.297	-2.58e-09
97.5	322.288	-2.34e-09
97.55	322.279	-2.06e-09
97.6	322.269	-1.4e-09
97.65	322.26	-6.02e-10
97.7	322.251	5.51e-10
97.75	322.242	1.13e-09
97.8	322.233	8.49e-10
97.85	322.223	-9.19e-10
97.9	322.214	-1.83e-09
97.95	322.205	-1.27e-09
98	322.196	-1.37e-10
98.05	322.187	-1.4e-09
98.1	322.177	-5.77e-10
98.15	322.168	1.45e-10
98.2	322.159	3e-11
98.25	322.15	1.28e-09
98.3	322.141	2.71e-09
98.35	322.127	1.41e-09
98.4	322.114	1.53e-09
98.45	322.1	-5e-11
98.5	322.087	-1.77e-09
98.55	322.073	-1.32e-09
98.6	322.06	-1.39e-10
98.65	322.046	-2.41e-09
98.7	322.033	-2.58e-09
98.75	322.019	-2.06e-09
98.8	322.006	-1.37e-09
98.85	321.992	6.76e-10
98.9	321.979	1.14e-10
98.95	321.965	-2.47e-09
99	321.952	3.23e-10
99.05	321.938	-2.79e-09
99.1	321.933	-2.47e-09
99.15	321.928	3.13e-11
99.2	321.922	-2.81e-09
99.25	321.917	-2.67e-09
99.3	321.912	-1.43e-09
99.35	321.907	-1.76e-10
99.4	321.902	-9.95e-10
99.45	321.896	9.53e-10
99.5	321.891	8.86e-11
99.55	321.886	-2.27e-09
99.6	321.881	-9.2e-10
99.65	321.876	-1.74e-09
99.7	321.871	-2.16e-09
99.75	321.865	-2.22e-09
99.8	321.86	1.6e-10
99.85	321.855	-1.7e-09
99.9	321.85	-2.37e-09
[truncated: 2,993 more rows]
